# Supplementary material for: Dinosaur Metabolism and the Allometry of Maximum Growth Rate
Source: PLoS One. 2016 Nov 9;11(11):e0163205. doi: 10.1371/journal.pone.0163205 (PMC5102473; doi:10.1371/journal.pone.0163205)
Supplement: S2 Table — The independent variable x is either log(M) or log(BMatMG). (DOCX) [file pone.0163205.s027.docx]

**S2 Table.** **Models used for fitting growth rate to mass.** The independent variable is either or .

| Function | Formula |
| --- | --- |
| Linear |  |
| Quadratic1 |  |
| Quadratic2 |  |
| Cubic1 |  |
| Cubic2 |  |
| Cubic3 |  |
| Cubic4 |  |
